# Supplementary material for: Dietary full-fat rice bran prevents the risk of heart ferroptosis and imbalance of energy metabolism induced by prolonged cold stimulation
Source: Royal Society of Chemistry journal article supplement (doi:10.1039/d2fo03673h), 2023-01-01
Supplement: d2fo03673h3.pdf [file d2fo03673h3.pdf]

**Table S3 Nutritional levels of Full-fat Rice Bran**

| <b>Items</b>      | <b>Content</b> |
|-------------------|----------------|
| Dry matter (%)    | 90.01          |
| Crude protein (%) | 14.79          |
| Crude fat (%)     | 17.84          |
| Crude Ash (%)     | 7.29           |
| Crude fiber (%)   | 8.95           |
| GE (MJ/kg)        | 18.48          |
