# Supplementary material for: Dietary full-fat rice bran prevents the risk of heart ferroptosis and imbalance of energy metabolism induced by prolonged cold stimulation
Source: Royal Society of Chemistry journal article supplement (doi:10.1039/d2fo03673h), 2023-01-01
Supplement: d2fo03673h4.pdf [file d2fo03673h4.pdf]

**Table S4 The real-time PCR primers**

| Gene           | GenBank ID     | Primer sequences (5' to 3')                                    |
|----------------|----------------|----------------------------------------------------------------|
| $\beta$ -actin | AY550069       | F: ATGCTTCTAGGCGGACTGT<br>R: CCATCCAACCGACTGCT                 |
| IL-6           | NM_214399      | F: ACAAAGCCACCACCCCTAAC<br>R: CGTGGACGGCATCAATCTCA             |
| INF- $\gamma$  | NM_214304.1    | F: ATGAGGCAGAGTACCGGGAT<br>R: AGCGTAAGCATTGCGGATCT             |
| TNF- $\alpha$  | NC_010449.5    | F: TTGAGCATCAACCCCTCTGGC<br>R: GGCATACCCACTCTGCCATT            |
| IL-10          | NM_214041.1    | F: CCTGGAAGACGTAATGCCGA<br>R: CACGGCCTTGCTCTTGTTTT             |
| ANP            | XM_005664986.3 | F: CCGAAGATAACGCCAGGGAG<br>R: AATCGGGTGCTCTTCACACC             |
| BNP            | NM_213846.1    | F: GAACTGCCAGGGATACAGGAG<br>R: CGTATTCCCCGGGAGGACTTG           |
| MYH7           | NM_213855.2    | F: ACCAACCTGTCCAAGTTCCG<br>R: AGGACTGGGAGCTTTGTTGC             |
| FATP1          | NM_001004046   | F: GGACATCAAGGGGACATCGGAAATC<br>R: GGTCTCCATCTCACACTCCTCTCC    |
| CD36           | NM_001044622   | F: CGTACAGAGTTCGTTATCTAGCCAAGG<br>R: AGCCAGATTGAGAACAGTGAAGGTG |
| FABP3          | NM_001099931.1 | F: TTGTGACACTGGATGGAGGC<br>R: TAAGTGCGAGTGCAAACCTGC            |
| CPT1B          | XM_021091195.1 | F: ACCTCGCCGATCTCTTCCAA<br>R: GCTGCTACCAGAGGTGTCCT             |
| ATGL           | EU373817.1     | F: ATGGTGCCCTACACGCTG<br>R: GCCTGTCTGCTCCTTTATCC               |
| Nrf2           | XM_013984303.2 | F: CCAATTCAGCCAGCACAACACATC<br>R: GACTGAGCCTGGTTAGGAGCAATG     |
| Keap1          | NM_001114671.1 | F: AGGCTATGATGGTCACACATTCTTGG<br>R: CAATCTGCTTCCGACAGGGTTCC    |
| NQO1           | NM_001159613.1 | F: AGGCTTTGAAGAGGAGAGGATGGG<br>R: CCTTTCTGGAGATGACGGGATTGAAG   |

|                |                |                                                                  |
|----------------|----------------|------------------------------------------------------------------|
| HO-1           | NM_001004027.1 | F: CCAGGTCCTCAAGAAGATTGCTCAG<br>R: GGGTCATCTCCAGAGTGTTCAATTCG    |
| PGC1- $\alpha$ | NM_213963.2    | F: ATGGAGCAATAAAGCGAAGAGCATTG<br>R: GAGGAGGGTCATCATTTGTGGTCAG    |
| VDAC1          | NM_213960.1    | F: TCAGAAGGTGAACAAGAAGTTGGAGAC<br>R: CGATCTGGTACTTGGCTGCTATTCC   |
| Cyt C          | NM_001129970.1 | F: CGAGTGGTGGCTTGTCTGTTGAG<br>R: GGC ACTGGGCACACTTCTGAAC         |
| Mfn1           | NM_001315732.1 | F: TGGACTTTATCCGAAACCAGATGAACC<br>R: AACCTTATTTGCCACCTCCTCTGTAAC |
| Mfn2           | XM_021095369.1 | F: CCACACCACCAACTGCTTCCTG<br>R: TCTTGACGCTCCTCTTCTCCTCTG         |
| OPA1           | XM_021070063.1 | F: ACAGAGGATGGTGCTTGTTGACTTAC<br>R: ACACAGTATGATGGCGTTGGGATTC    |
| Fis1           | XM_021086263.1 | F: CAGACAGAGCCACAGAACAACCAG<br>R: CAAGTCCAATGAGTCCAGCCAGTC       |
| Mff            | NM_001244126.1 | F: CAGGTTCCAGAGAGAATTGTCGTAGC<br>R: TTAGTGCCAGAGGTTTAAAGGGAGTTG  |
| BNIP3          | XM_003359404.4 | F: GAGGAGGATTACATGGAGAGGAGGAG<br>R: TCGGGTGCTTGAAGAGGAGGAAC      |
| PINK1          | XM_021095478.1 | F: GGCGGTGATTGACTACAGCAAGG<br>R: TGGTAACTGCGGCTTTCAAGGTG         |
| parkin         | NM_001044603.2 | F: TCCCAGTGGAGGTCGATTCT<br>R: CCTGCGAAAATCACACGCAA               |
| p62            | NM_001244307.1 | F: CTGCCTGAAGACTATTACACGAGACC<br>R: GAAGATGCTTGTGCCGAGGATAGAG    |
| LC3 II         | NM_001190290.1 | F: TTCTTCCTGTTAGTGAACGGACATAGC<br>R: ATCCATCTTCATCCTTCTCGCTTTTCG |
| PTGS2          | NM_214321.1    | F: CCAGACGAGCAGGCTGATAC<br>R: GGGATGCCAGTGGTAGAGTG               |
| GPX4           | NM_214407.1    | F: AGAACGGCTGTGTGGTGAAG<br>R: CCACCAGGGGCTGGTTTTTA               |
| FSP1           | XM_021073864.1 | F: GAGGCGCCGAGTCACG<br>R: GAGACCTGGGACCCCATCTT                   |
| GCH1           | XM_021102253.1 | F: GTCCACTCTGGCTTGTGAAGT                                         |

|              |                |                            |
|--------------|----------------|----------------------------|
|              |                | R: GCTTGCCAGTCCGAAAACATC   |
| FtH          | NM_213975.1    | F: ATTTGCGCTGCACGTGGT      |
|              |                | R: CCTGTGCAAGTTGGTAATGTGG  |
| SLC7A11      | XM_021101587.1 | F: TGCGGGTGACTACAATGGTC    |
|              |                | R: GATCCCTGCTCCGATGATGG    |
| TfR          | NM_214001.1    | F: TTGGCGGAGAACCATTGTCA    |
|              |                | R: GCGACACCGATGTGGTTACT    |
| PROM2        | XM_021087062.1 | F: CTGGAACGCCTTCTGGTTCT    |
|              |                | R: AAGATCACGGGGGCCTACA     |
| SLC40A1      | XM_003483701.4 | F: GGAGACTGCAATACGTTGCT    |
|              |                | R: AGTGGGGAATGCAATTCAGG    |
| TLR4         | NM_001113039.2 | F: CAGTCAAGATACTGGACCTGAGC |
|              |                | R: GGCTCCCAGGGCTAAAACCTCT  |
| MyD88        | NM_001099923.1 | F: CCATTCGAGATGACCCCCTG    |
|              |                | R: TAGCAATGGACCAGACGCAG    |
| HMGB1        | NM_001004034.1 | F: GAGGAACTTGAGACCCACCA    |
|              |                | R: GTGTCCTTCCTCCCTCATGT    |
| NLRP3        | NM_001256770.2 | F: CTGGGACTCTGACTAGGGCT    |
|              |                | R: TTTTCTGTCTGGCCCCGAG     |
| Caspase1     | NM_214162.1    | F: TACAAGAATCCCAGGCGGTG    |
|              |                | R: CCTTTGGGCTATGTCTGGGG    |
| IL-1 $\beta$ | NM_2140551.1   | F: GCCAACGTGCAGTCTATGGAGTG |
|              |                | R: GGTGGAGAGCCTTCAGCATGTG  |

---
