# Supplementary material for: Dietary full-fat rice bran prevents the risk of heart ferroptosis and imbalance of energy metabolism induced by prolonged cold stimulation
Source: Royal Society of Chemistry journal article supplement (doi:10.1039/d2fo03673h), 2023-01-01
Supplement: d2fo03673h5.pdf [file d2fo03673h5.pdf]

**Table S5 Information for primary and secondary antibodies**

| <b>Primary antibodies</b>                | <b>Dilution ratio</b> | <b>Source of antibodies</b> | <b>Cat.No.</b> | <b>Clone type</b>   |
|------------------------------------------|-----------------------|-----------------------------|----------------|---------------------|
| Rabbit Anti-Nrf2 antibody                | 1: 1000               | ABclonal, Wuhan, China      | A0674          | Polyclonal antibody |
| Rabbit Anti-BNIP3 antibody               | 1: 1000               | Bioss, Beijing, China       | bs-4239R       | Polyclonal antibody |
| Rabbit Anti-PINK1 antibody               | 1: 1000               | Bioss, Beijing, China       | A11435         | Polyclonal antibody |
| Rabbit Anti-HO-1 antibody                | 1: 1000               | ABclonal, Wuhan, China      | A1346          | Polyclonal antibody |
| Rabbit Anti-NLRP3 antibody               | 1: 1000               | Wanleibio, Shenyang, China  | WL02635        | Polyclonal antibody |
| Rabbit Anti-mature-IL-1 $\beta$ antibody | 1: 1000               | Wanleibio, Shenyang, China  | WL00891        | Polyclonal antibody |
| Rabbit Anti-MyD88 antibody               | 1: 1000               | Wanleibio, Shenyang, China  | WL02494        | Polyclonal antibody |
| Rabbit Anti-COX-2 antibody               | 1: 1000               | Wanleibio, Shenyang, China  | WL01750        | Polyclonal antibody |
| $\beta$ -Actin Rabbit mAb                | 1: 50000              | ABclonal, Wuhan, China      | AC038          | Polyclonal antibody |
| <b>Secondary antibody</b>                | <b>Dilution ratio</b> | <b>Source of antibodies</b> | <b>Cat.No.</b> |                     |
| HRP Goat Anti-Rabbit IgG (H+L)           | 1: 5000               | ABclonal, Wuhan, China      | AS014          |                     |
